# Supplementary material for: The synthesis and co-ordination chemistry of new functionalised pyridylphosphines derived from Ph2PCH2OH †
Source: Royal Society of Chemistry journal article supplement (doi:10.1039/b003759l), 2000-01-01
Supplement: b003759l.doc [file b003759l.doc]

Microanalytical data for compounds **Ia****III**, **V** and **1****15**.a

|  | Analysis (%) |  | |
| --- | --- | --- | --- |
| Compound | C | H | N |
| **Ia** | 69.70 (70.10) | 5.50 (5.50) | 8.90 (9.10) |
| **Ib** | 73.70 (73.95) | 5.75 (5.85) | 9.45 (9.60) |
| **II** | 70.45 (70.85) | 5.55 (5.15) | 5.30 (5.50) |
| **III** | 65.90 (66.65) | 5.10 (4.85) | 5.35 (5.20) |
| **V** | 66.65 (66.65) | 5.25 (5.30) | 9.00 (8.65) |
| **1** | 48.55 (49.00) | 4.15 (3.90) | 6.40 (6.35) |
| **2**b | 55.30 (55.40) | 4.20 (4.20) | 4.20 (4.30) |
| **3** | 53.05 (53.50) | 3.85 (3.90) | 4.05 (4.15) |
| **4** | 47.25 (47.50) | 3.45 (3.45) | 3.70 (3.60) |
| **5** | 40.45 (40.00) | 3.45 (3.15) | 5.10 (5.20) |
| **6a/6c** | 54.00 (54.75) | 5.10 (5.10) | 4.15 (4.55) |
| **6b/6d** | 56.15 (56.20) | 4.95 (5.25) | 4.55 (4.70) |
| **7** | 58.70 (58.95) | 4.90 (4.95) | 3.45 (3.45) |
| **8** | 56.55 (56.75) | 4.55 (4.75) | 3.35 (3.30) |
| **9**b | 52.85 (52.90) | 5.20 (5.40) | 4.25 (4.40) |
| **10**c | 57.70 (58.10) | 5.25 (5.15) | 3.50 (3.40) |
| **11** | 57.00 (56.55) | 4.80 (4.90) | 3.35 (3.30) |
| **12** | 54.20 (54.35) | 4.40 (4.95) | 2.30 (2.55) |
| **13**d | 52.95 (53.00) | 5.10 (5.20) | 2.25 (2.25) |
| **14**e | 52.30 (52.60) | 4.85 (5.00) | 2.40 (2.45) |
| **15** | 46.90 (46.60) | 4.30 (4.40) | 2.20 (2.15) |

a Calculated values in parentheses b Contains 1 mol. H2O c Contains 0.5 mol. H2O d Contains 1 mol. CH2Cl2 e Contains 0.5 mol. CH2Cl2
